# Supplementary material for: Transcriptome Analysis Reveals Key Pathways and Hormone Activities Involved in Early Microtuber Formation of Dioscorea opposita
Source: Biomed Res Int. 2020 Mar 11;2020:8057929. doi: 10.1155/2020/8057929 (PMC7086419; doi:10.1155/2020/8057929)
Supplement: Supplementary Materials — Figure S1: sequence-length distributions of unigenes and transcripts assembled from the Illumina reads. Figure S2: verification of RNA-Seq results by qRT-PCR. Figure S3: result summary for sequence-homology searching against the NCBI NR database. Table S1: summary of Illumina transcriptome sequencing for microtuber formation of D. opposita. Table S2: description of the 20 most up- and downregulated genes in the BUD vs. EXP comparison. Table S3: description of the 20 most up- and downregulated genes in the MTV vs. EXP comparison. Table S4: description of the 20 most up- and downregulated genes in the MTV vs. BUD comparison. Table S5: KEGG enriched pathways of specificity DEGs identified during microtuber induction and formation. Table S6: differentially expressed genes related to starch and sucrose metabolism during microtuber formation. Table S7: differentially expressed genes related to plant hormone signal transduction pathways during microtuber formation. Table S8: the primers used for the analysis of gene expression by qRT-PCR. [file 8057929.f1.zip]

Archive with 5 entries (5 files):
- Supplementary figures.doc
- Table S1, S5-S8.doc
- Table S2.xls
- Table S3.xls
- Table S4.xls
