# Supplementary material for: Transcriptome Analysis Reveals Key Pathways and Hormone Activities Involved in Early Microtuber Formation of Dioscorea opposita
Source: Biomed Res Int. 2020 Mar 11;2020:8057929. doi: 10.1155/2020/8057929 (PMC7086419; doi:10.1155/2020/8057929)
Supplement: Supplementary Materials — Figure S1: sequence-length distributions of unigenes and transcripts assembled from the Illumina reads. Figure S2: verification of RNA-Seq results by qRT-PCR. Figure S3: result summary for sequence-homology searching against the NCBI NR database. Table S1: summary of Illumina transcriptome sequencing for microtuber formation of D. opposita. Table S2: description of the 20 most up- and downregulated genes in the BUD vs. EXP comparison. Table S3: description of the 20 most up- and downregulated genes in the MTV vs. EXP comparison. Table S4: description of the 20 most up- and downregulated genes in the MTV vs. BUD comparison. Table S5: KEGG enriched pathways of specificity DEGs identified during microtuber induction and formation. Table S6: differentially expressed genes related to starch and sucrose metabolism during microtuber formation. Table S7: differentially expressed genes related to plant hormone signal transduction pathways during microtuber formation. Table S8: the primers used for the analysis of gene expression by qRT-PCR. [file 8057929.f1.zip › Table S2.xls]

## Sheet: Table S2
Table S2. Description of the 20 most up- and down-regulated genes in the BUD vs EXP comparison.
Gene ID	Top BlastX hit (Accession number)	Expression value			BUD vs EXP				MTV vs EXP				MTV vs BUD
		DMT0	DMT3	DMT4	log2 FC	pval	padj	Regulation	log2 FC	pval	padj	Regulation	log2 FC	pval	padj	Regulation
comp63773_c0	unnamed protein product [Vitis vinifera](CBI19877.3)	0	53.08	43.46	Inf	3.9782e-15	6.8254e-13	up	Inf	1.239e-11	1.8943e-09	up	noTest	noTest	noTest	noTest
comp75210_c0	predicted protein [Hordeum vulgare subsp. vulgare](BAK04678.1)	0	52.38	75.84	Inf	8.5059e-15	1.3967e-12	up	Inf	7.011e-18	2.6332e-15	up	noTest	noTest	noTest	noTest
comp83497_c0	Pectinesterase-2 precursor, putative [Ricinus communis](XP_002523112.1)	0	231.38	1441.1	Inf	9.0007e-14	1.2982e-11	up	Inf	4.5879e-05	0.0016276	up	noTest	noTest	noTest	noTest
comp62795_c0	no hit	0	35.38	0	Inf	8.9594e-11	8.0999e-09	up	noTest	noTest	noTest	noTest	noTest	noTest	noTest	noTest
comp62661_c2	conserved hypothetical protein [Ricinus communis] (XP_002514863.1)	0	28.3	17.49	Inf	9.5026e-09	6.2623e-07	up	Inf	1.3215e-05	0.00056372	up	noTest	noTest	noTest	noTest
comp57323_c0	type I inositol polyphosphate 5-phosphatase, putative [Ricinus communis](XP_002521915.1)	0	21.28	0	Inf	7.4368e-07	3.3398e-05	up	noTest	noTest	noTest	noTest	noTest	noTest	noTest	noTest
comp48705_c0	no hit	0	59.48	34.55	Inf	1.1722e-06	5.0565e-05	up	Inf	1.0166e-09	1.1612e-07	up	noTest	noTest	noTest	noTest
comp30647_c0	no hit	0	19.63	0	Inf	2.2253e-06	8.8857e-05	up	noTest	noTest	noTest	noTest	noTest	noTest	noTest	noTest
comp75448_c0	hypothetical protein OsI_19945 [Oryza sativa Indica Group](EAY98030.1)	0	118.63	29.92	Inf	3.032e-06	0.00011799	up	Inf	7.2599e-05	0.0024051	up	noTest	noTest	noTest	noTest
comp69576_c0	hypothetical protein VITISV_029053 [Vitis vinifera](CAN67224.1)	0	17.84	12.76	Inf	6.9326e-06	0.00024764	up	Inf	0.00025963	0.0070391	up	noTest	noTest	noTest	noTest
comp61820_c0	RecName: Full=Multicystatin; Short=MC >gi|415591|gb|AAA16120.1| multicystatin [Solanum tuberosum](P37842.1)	0	33.57	11.93	Inf	9.5419e-06	0.00032857	up	Inf	0.00048675	0.011651	up	noTest	noTest	noTest	noTest
comp67257_c0	glycosyltransferase GT14A05 [Pueraria montana var. lobata](ADV71369.1)	0	17.34	0	Inf	9.9541e-06	0.00034106	up	noTest	noTest	noTest	noTest	noTest	noTest	noTest	noTest
comp73725_c1	PREDICTED: uncharacterized protein LOC100841245 [Brachypodium distachyon](XP_003572723.1)	0	17.2	0	Inf	1.0253e-05	0.00034989	up	noTest	noTest	noTest	noTest	noTest	noTest	noTest	noTest
comp63127_c0	no hit	0	16.83	0	Inf	1.431e-05	0.00046572	up	noTest	noTest	noTest	noTest	noTest	noTest	noTest	noTest
comp66330_c0	disease resistance response protein [Cucumis melo subsp. melo](ADN34006.1)	0	16.56	0	Inf	1.5185e-05	0.00049048	up	noTest	noTest	noTest	noTest	noTest	noTest	noTest	noTest
comp59045_c0	predicted protein [Populus trichocarpa](XP_002323084.1)	0	16.42	11.93	Inf	1.5648e-05	0.00050285	up	Inf	0.00048675	0.011651	up	noTest	noTest	noTest	noTest
comp28369_c0	no hit	0	16.02	0	Inf	1.7154e-05	0.00054286	up	noTest	noTest	noTest	noTest	noTest	noTest	noTest	noTest
comp62285_c0	F-box domain containing protein, expressed [Oryza sativa Japonica Group](ABA99360.2)	0	16.19	0	Inf	2.1215e-05	0.000656	up	noTest	noTest	noTest	noTest	noTest	noTest	noTest	noTest
comp5278_c0	no hit	0	13.49	0	Inf	0.0001073	0.0026805	up	noTest	noTest	noTest	noTest	noTest	noTest	noTest	noTest
comp60369_c0	no hit	0	13.53	9.12	Inf	0.00013762	0.003305	up	Inf	0.002863	0.046852	up	noTest	noTest	noTest	noTest
comp74127_c0	conserved hypothetical protein [Ricinus communis](XP_002521440.1)	244.94	0	0.96	-Inf	1.9144e-40	3.5597e-37	down	-7.9919	7.6861e-32	1.0415e-28	down	noTest	noTest	noTest	noTest
comp75466_c0	light-harvesting complex I protein Lhca5 [Populus trichocarpa](XP_002327136.1)	109.83	0	0	-Inf	6.1115e-19	1.6297e-16	down	-Inf	5.2901e-20	2.6113e-17	down	noTest	noTest	noTest	noTest
comp80946_c0	fructose-bisphosphate aldolase [Pandanus amaryllifolius](AAR88661.1)	339.86	0	0	-Inf	4.3276e-17	9.5125e-15	down	-Inf	8.7849e-18	3.2816e-15	down	noTest	noTest	noTest	noTest
comp80591_c0	no hit	129.37	0	0	-Inf	1.984e-14	3.1308e-12	down	-Inf	4.1989e-15	1.1291e-12	down	noTest	noTest	noTest	noTest
comp65662_c1	predicted protein [Populus trichocarpa](XP_002325833.1)	71.13	0	3.16	-Inf	3.2837e-13	4.4473e-11	down	-4.5623	9.9803e-10	1.1457e-07	down	noTest	noTest	noTest	noTest
comp51861_c0	no hit	48.01	0	0	-Inf	3.1676e-12	3.6566e-10	down	-Inf	4.6796e-12	7.7925e-10	down	noTest	noTest	noTest	noTest
comp77178_c1	no hit	44.84	0	0	-Inf	1.005e-11	1.0704e-09	down	-Inf	1.5312e-11	2.2954e-09	down	noTest	noTest	noTest	noTest
comp68148_c0	no hit	70.45	0	0	-Inf	8.3042e-11	7.5673e-09	down	-Inf	2.5564e-11	3.7589e-09	down	noTest	noTest	noTest	noTest
comp53306_c0	no hit	38.1	0	1.1	-Inf	3.722e-10	3.0631e-08	down	-5.1855	2.617e-08	2.2922e-06	down	noTest	noTest	noTest	noTest
comp85374_c1	chlorophyll a/b binding protein, partial [Solanum tuberosum](AAA80595.1)	103.01	0	0.48	-Inf	1.3917e-08	8.9066e-07	down	-7.7422	4.0088e-08	3.3258e-06	down	noTest	noTest	noTest	noTest
comp65717_c0	PREDICTED: zinc finger protein CONSTANS-LIKE 16 [Vitis vinifera](XP_002282578.1)	29.74	0	0	-Inf	3.1109e-08	1.8611e-06	down	noTest	noTest	noTest	noTest	noTest	noTest	noTest	noTest
comp61697_c0	hypothetical protein ARALYDRAFT_359459 [Arabidopsis lyrata subsp. lyrata](XP_002862658.1)	28.34	0	0	-Inf	7.3445e-08	4.075e-06	down	-Inf	6.3863e-08	5.0095e-06	down	noTest	noTest	noTest	noTest
comp68706_c0	YABBY transcription factor [Lilium longiflorum](ABP35569.1)	109.6	0	5.002	-Inf	8.8724e-08	4.8446e-06	down	-4.5193	3.775e-05	0.0013804	down	noTest	noTest	noTest	noTest
comp67412_c0	no hit	46.96	0	0	-Inf	1.4342e-07	7.5787e-06	down	-Inf	6.6831e-08	5.2305e-06	down	noTest	noTest	noTest	noTest
comp58862_c0	Os05g0214900 [Oryza sativa Japonica Group](NP_001054930.1)	25.17	0	0	-Inf	4.0991e-07	1.968e-05	down	-Inf	3.3267e-07	2.2127e-05	down	noTest	noTest	noTest	noTest
comp62411_c0	no hit	24.87	0	0.62	-Inf	5.0288e-07	2.36e-05	down	-5.4028	3.0841e-06	0.00015894	down	noTest	noTest	noTest	noTest
comp64827_c0	no hit	23.49	0	0	-Inf	1.0689e-06	4.6574e-05	down	-Inf	8.4397e-07	5.0497e-05	down	noTest	noTest	noTest	noTest
comp68436_c0	no hit	22.98	0	1.23	-Inf	1.3975e-06	5.8988e-05	down	-4.2888	3.1305e-05	0.0011745	down	noTest	noTest	noTest	noTest
comp66497_c1	no hit	22.92	0	0.48	-Inf	1.4194e-06	5.9691e-05	down	-5.6409	8.1386e-06	0.00037124	down	noTest	noTest	noTest	noTest
comp30324_c0	hypothetical protein MTR_7g072120 [Medicago truncatula](XP_003623535.1)	20.89	0	0.48	-Inf	4.6879e-06	0.00017377	down	-5.5069	2.4477e-05	0.00095243	down	noTest	noTest	noTest	noTest
