# Supplementary material for: Transcriptome Analysis Reveals Key Pathways and Hormone Activities Involved in Early Microtuber Formation of Dioscorea opposita
Source: Biomed Res Int. 2020 Mar 11;2020:8057929. doi: 10.1155/2020/8057929 (PMC7086419; doi:10.1155/2020/8057929)
Supplement: Supplementary Materials — Figure S1: sequence-length distributions of unigenes and transcripts assembled from the Illumina reads. Figure S2: verification of RNA-Seq results by qRT-PCR. Figure S3: result summary for sequence-homology searching against the NCBI NR database. Table S1: summary of Illumina transcriptome sequencing for microtuber formation of D. opposita. Table S2: description of the 20 most up- and downregulated genes in the BUD vs. EXP comparison. Table S3: description of the 20 most up- and downregulated genes in the MTV vs. EXP comparison. Table S4: description of the 20 most up- and downregulated genes in the MTV vs. BUD comparison. Table S5: KEGG enriched pathways of specificity DEGs identified during microtuber induction and formation. Table S6: differentially expressed genes related to starch and sucrose metabolism during microtuber formation. Table S7: differentially expressed genes related to plant hormone signal transduction pathways during microtuber formation. Table S8: the primers used for the analysis of gene expression by qRT-PCR. [file 8057929.f1.zip › Table S3.xls]

## Sheet: Table S3
Table S3. Description of the 20 most up- and down-regulated genes in the MTV vs EXP comparison.
Gene ID	Top BlastX hit (Accession number)	Expression value			DMT3 vs DMT0				DMT4 vs DMT0				DMT4 vs DMT3
		DMT0	DMT3	DMT4	log2 FC	pval	padj	Regulation	log2 FC	pval	padj	Regulation	log2 FC	pval	padj	Regulation
comp75210_c0	predicted protein [Hordeum vulgare subsp. vulgare](BAK04678.1)	0	52.38	75.84	Inf	8.5059e-15	1.3967e-12	up	Inf	7.011e-18	2.6332e-15	up	noTest	noTest	noTest	noTest
comp56151_c0	Os11g0171300 [Oryza sativa Japonica Group]（NP_001065862.1）	0	0	110.58	noTest	noTest	noTest	noTest	Inf	3.332e-17	1.2056e-14	up	Inf	3.9116e-15	9.3631e-12	up
comp65499_c0	Os12g0291100 [Oryza sativa Japonica Group]（NP_001066604.1）	0	0	53.51	noTest	noTest	noTest	noTest	Inf	2.4121e-15	6.6945e-13	up	Inf	1.5577e-14	3.6001e-11	up
comp32765_c0	Os08g0200300 [Oryza sativa Japonica Group]（NP_001061210.1）	0	0	51.34	noTest	noTest	noTest	noTest	Inf	1.0435e-14	2.6609e-12	up	Inf	6.5845e-14	1.3791e-10	up
comp25205_c0	Ribulose bisphosphate carboxylase/oxygenase activase, chloroplast precursor, putative, expressed [Oryza sativa Japonica Group]（ABG22615.1）	0	0	50.15	noTest	noTest	noTest	noTest	Inf	1.7397e-14	4.2332e-12	up	Inf	1.1282e-13	2.2915e-10	up
comp52862_c0	putative chlorophyll a/b-binding protein type III precursor [Oryza sativa Japonica Group]（BAD25284.1）	0	0	46.19	noTest	noTest	noTest	noTest	Inf	1.4707e-13	3.0429e-11	up	Inf	9.7569e-13	1.7209e-09	up
comp63773_c0	unnamed protein product [Vitis vinifera](CBI19877.3)	0	53.08	43.46	Inf	3.9782e-15	6.8254e-13	up	Inf	1.239e-11	1.8943e-09	up	noTest	noTest	noTest	noTest
comp48705_c0	no hit	0	59.48	34.55	Inf	1.1722e-06	5.0565e-05	up	Inf	1.0166e-09	1.1612e-07	up	noTest	noTest	noTest	noTest
comp50303_c0	Os06g0320500 [Oryza sativa Japonica Group]（NP_001057513.1）	0	0	26.56	noTest	noTest	noTest	noTest	Inf	9.2881e-09	8.9026e-07	up	Inf	5.2865e-08	6.0054e-05	up
comp56151_c1	Fructose-bisphosphate aldolase, chloroplast precursor, putative, expressed [Oryza sativa Japonica Group]（ABG22383.1）	0	0	25.83	noTest	noTest	noTest	noTest	Inf	1.0785e-08	1.0224e-06	up	Inf	6.3633e-08	6.9916e-05	up
comp68252_c0	hypothetical protein ARALYDRAFT_476276 [Arabidopsis lyrata subsp. lyrata]（XP_002887374.1）	0	10.46	35.76	Inf	0.0010098	0.017611	up	Inf	1.3861e-07	1.0073e-05	up	noTest	noTest	noTest	noTest
comp34263_c0	Os08g0435900 [Oryza sativa Japonica Group] （NP_001061884.1）	0	0	20.92	noTest	noTest	noTest	noTest	Inf	2.7989e-07	1.8907e-05	up	Inf	1.3677e-06	0.0011394	up
comp50883_c0	Os11g0242800 [Oryza sativa Japonica Group]（NP_001067593.1）	0	0	24.2	noTest	noTest	noTest	noTest	Inf	6.0736e-07	3.8226e-05	up	Inf	3.8664e-06	0.0027865	up
comp72693_c0	putative chloroplast chlorophyll A-B binding protein type I [Sorghum bicolor]（ABB03717.1）	0	0	19.8	noTest	noTest	noTest	noTest	Inf	6.6648e-07	4.1271e-05	up	Inf	3.0303e-06	0.0022884	up
comp594689_c0	Os01g0501800 [Oryza sativa Japonica Group]（NP_001043134.1）	0	0	17.95	noTest	noTest	noTest	noTest	Inf	1.8953e-06	0.00010313	up	Inf	8.226e-06	0.0054224	up
comp58084_c1	Os01g0910900 [Oryza sativa Japonica Group]（NP_001045156.1）	0	0	17.49	noTest	noTest	noTest	noTest	Inf	3.2148e-06	0.00016457	up	Inf	1.3063e-05	0.0081827	up
comp50494_c0	expressed protein [Oryza sativa Japonica Group]（ABA98708.1）	0	0	17.24	noTest	noTest	noTest	noTest	Inf	3.3994e-06	0.00017223	up	Inf	1.3949e-05	0.008555	up
comp534978_c0	Os03g0583800 [Oryza sativa Japonica Group]（NP_001050563.1）	0	0	16.95	noTest	noTest	noTest	noTest	Inf	4.4987e-06	0.00021987	up	Inf	1.7893e-05	0.010428	up
comp419734_c0	Os02g0698000 [Oryza sativa Japonica Group]（NP_001047825.1）	0	0	16.18	noTest	noTest	noTest	noTest	Inf	6.6773e-06	0.00031281	up	Inf	2.6222e-05	0.014646	up
comp72704_c1	hypothetical protein VITISV_001146 [Vitis vinifera]（CAN61026.1）	0	0	18.64	noTest	noTest	noTest	noTest	Inf	8.3699e-06	0.00038054	up	noTest	noTest	noTest	noTest
comp80427_c0	no hit	224.28	54.91	0	-1.9277	6.7315e-09	4.5674e-07	down	-Inf	8.4317e-34	1.4941e-30	down	-Inf	1.4e-15	3.47e-12	down
comp79295_c0	no hit	129.65	17.9	0	-2.7537	4.8395e-11	4.5673e-09	down	-Inf	1.5838e-24	1.2581e-21	down	-Inf	4.7e-06	0.0032804	down
comp75902_c0	bark protein-like protein [Thuja occidentalis]（AAV65286.1）	126.45	0	0	noTest	noTest	noTest	noTest	-Inf	2.312e-23	1.6304e-20	down	noTest	noTest	noTest	noTest
comp78241_c1	no hit	115.03	1.15	0	-6.5818	1.9462e-21	6.5961e-19	down	-Inf	5.7712e-22	3.6929e-19	down	noTest	noTest	noTest	noTest
comp75466_c0	light-harvesting complex I protein Lhca5 [Populus trichocarpa](XP_002327136.1)	109.83	0	0	-Inf	6.1115e-19	1.6297e-16	down	-Inf	5.2901e-20	2.6113e-17	down	noTest	noTest	noTest	noTest
comp80946_c0	fructose-bisphosphate aldolase [Pandanus amaryllifolius](AAR88661.1)	339.86	0	0	-Inf	4.3276e-17	9.5125e-15	down	-Inf	8.7849e-18	3.2816e-15	down	noTest	noTest	noTest	noTest
comp69895_c0	no hit	79.92	12.54	0	-2.6058	4.1662e-07	1.9974e-05	down	-Inf	4.2741e-17	1.5225e-14	down	noTest	noTest	noTest	noTest
comp52383_c0	no hit	79.56	0.64	0	-6.8872	1.2607e-14	2.0219e-12	down	-Inf	5.1904e-16	1.7e-13	down	noTest	noTest	noTest	noTest
comp68732_c0	unknown [Picea sitchensis]（ABK24240.1）	68.83	0	0	noTest	noTest	noTest	noTest	-Inf	2.6007e-15	7.132e-13	down	noTest	noTest	noTest	noTest
comp80591_c0	no hit	129.37	0	0	-Inf	1.984e-14	3.1308e-12	down	-Inf	4.1989e-15	1.1291e-12	down	noTest	noTest	noTest	noTest
comp39618_c0	no hit	78.14	0.51	0	-7.2725	4.1482e-13	5.4712e-11	down	-Inf	6.3419e-15	1.6601e-12	down	noTest	noTest	noTest	noTest
comp60321_c0	ribulose bisphosphate carboxylase [Larix laricina]（CAA38346.1）	53.14	0	0	noTest	noTest	noTest	noTest	-Inf	1.2857e-12	2.326e-10	down	noTest	noTest	noTest	noTest
comp51861_c0	no hit	48.01	0	0	-Inf	3.1676e-12	3.6566e-10	down	-Inf	4.6796e-12	7.7925e-10	down	noTest	noTest	noTest	noTest
comp71390_c0	class I chitinase [Musa AB Group](ACJ06634.3)	47.31	56.29	0	noTest	noTest	noTest	noTest	-Inf	1.4329e-11	2.1668e-09	down	-Inf	9.16e-16	2.36e-12	down
comp77178_c1	no hit	44.84	0	0	-Inf	1.005e-11	1.0704e-09	down	-Inf	1.5312e-11	2.2954e-09	down	noTest	noTest	noTest	noTest
comp63336_c0	no hit	47.16	1.79	0	-4.6544	4.1279e-09	2.892e-07	down	-Inf	1.6456e-11	2.4562e-09	down	noTest	noTest	noTest	noTest
comp68148_c0	no hit	70.45	0	0	-Inf	8.3042e-11	7.5673e-09	down	-Inf	2.5564e-11	3.7589e-09	down	noTest	noTest	noTest	noTest
comp47854_c0	ribulose-1,5-bisphosphate carboxylase/oxygenase activase 2 [Gossypium hirsutum]（AAG61121.1）	35.63	0	0	noTest	noTest	noTest	noTest	-Inf	3.0929e-09	3.2483e-07	down	noTest	noTest	noTest	noTest
comp63832_c0	no hit	122.81	1.65	0	-6.1501	4.2104e-07	2.0173e-05	down	-Inf	3.8194e-09	3.9573e-07	down	noTest	noTest	noTest	noTest
comp66703_c0	light-harvesting chlorophyll a/b-binding protein of photosystem II [Cryptomeria japonica]（BAA32346.1）	33.56	0	0	noTest	noTest	noTest	noTest	-Inf	8.8543e-09	8.5222e-07	down	noTest	noTest	noTest	noTest
