# Supplementary material for: Transcriptome Analysis Reveals Key Pathways and Hormone Activities Involved in Early Microtuber Formation of Dioscorea opposita
Source: Biomed Res Int. 2020 Mar 11;2020:8057929. doi: 10.1155/2020/8057929 (PMC7086419; doi:10.1155/2020/8057929)
Supplement: Supplementary Materials — Figure S1: sequence-length distributions of unigenes and transcripts assembled from the Illumina reads. Figure S2: verification of RNA-Seq results by qRT-PCR. Figure S3: result summary for sequence-homology searching against the NCBI NR database. Table S1: summary of Illumina transcriptome sequencing for microtuber formation of D. opposita. Table S2: description of the 20 most up- and downregulated genes in the BUD vs. EXP comparison. Table S3: description of the 20 most up- and downregulated genes in the MTV vs. EXP comparison. Table S4: description of the 20 most up- and downregulated genes in the MTV vs. BUD comparison. Table S5: KEGG enriched pathways of specificity DEGs identified during microtuber induction and formation. Table S6: differentially expressed genes related to starch and sucrose metabolism during microtuber formation. Table S7: differentially expressed genes related to plant hormone signal transduction pathways during microtuber formation. Table S8: the primers used for the analysis of gene expression by qRT-PCR. [file 8057929.f1.zip › Table S4.xls]

## Sheet: Table S4
Table S4. Description of the 20 most up- and down-regulated genes in the MTV vs BUD comparison.
Gene ID	Top BlastX hit (Accession number)	Expression value			DMT3 vs DMT0				DMT4 vs DMT0				DMT4 vs DMT3
		DMT0	DMT3	DMT4	log2 FC	pval	padj	Regulation	log2 FC	pval	padj	Regulation	log2 FC	pval	padj	Regulation
comp43815_c0	RuBisCO activase small isoform precursor [Oryza sativa] （BAA97584.1）	0.48	0	278.21	noTest	noTest	noTest	noTest	9.176	9.3554e-38	2.4866e-34	up	Inf	1.8136e-42	1.5194e-38	up
comp72693_c1	Os03g0592500 [Oryza sativa Japonica Group]（NP_001050586.1）	1.39	0	72.31	noTest	noTest	noTest	noTest	5.9131	5.9056e-16	1.9071e-13	up	Inf	2.0494e-18	7.2294e-15	up
comp56151_c0	Os11g0171300 [Oryza sativa Japonica Group]（NP_001065862.1）	0	0	110.58	noTest	noTest	noTest	noTest	Inf	3.332e-17	1.2056e-14	up	Inf	3.9116e-15	9.3631e-12	up
comp65499_c0	Os12g0291100 [Oryza sativa Japonica Group]（NP_001066604.1）	0	0	53.51	noTest	noTest	noTest	noTest	Inf	2.4121e-15	6.6945e-13	up	Inf	1.5577e-14	3.6001e-11	up
comp32765_c0	Os08g0200300 [Oryza sativa Japonica Group]（NP_001061210.1）	0	0	51.34	noTest	noTest	noTest	noTest	Inf	1.0435e-14	2.6609e-12	up	Inf	6.5845e-14	1.3791e-10	up
comp25205_c0	Ribulose bisphosphate carboxylase/oxygenase activase, chloroplast precursor, putative, expressed [Oryza sativa Japonica Group]（ABG22615.1）	0	0	50.15	noTest	noTest	noTest	noTest	Inf	1.7397e-14	4.2332e-12	up	Inf	1.1282e-13	2.2915e-10	up
comp52862_c0	putative chlorophyll a/b-binding protein type III precursor [Oryza sativa Japonica Group]（BAD25284.1）	0	0	46.19	noTest	noTest	noTest	noTest	Inf	1.4707e-13	3.0429e-11	up	Inf	9.7569e-13	1.7209e-09	up
comp50303_c0	Os06g0320500 [Oryza sativa Japonica Group]（NP_001057513.1）	0	0	26.56	noTest	noTest	noTest	noTest	Inf	9.2881e-09	8.9026e-07	up	Inf	5.2865e-08	6.0054e-05	up
comp56151_c1	Fructose-bisphosphate aldolase, chloroplast precursor, putative, expressed [Oryza sativa Japonica Group]（ABG22383.1）	0	0	25.83	noTest	noTest	noTest	noTest	Inf	1.0785e-08	1.0224e-06	up	Inf	6.3633e-08	6.9916e-05	up
comp34263_c0	Os08g0435900 [Oryza sativa Japonica Group] （NP_001061884.1）	0	0	20.92	noTest	noTest	noTest	noTest	Inf	2.7989e-07	1.8907e-05	up	Inf	1.3677e-06	0.0011394	up
comp72693_c0	putative chloroplast chlorophyll A-B binding protein type I [Sorghum bicolor]（ABB03717.1）	0	0	19.8	noTest	noTest	noTest	noTest	Inf	6.6648e-07	4.1271e-05	up	Inf	3.0303e-06	0.0022884	up
comp50883_c0	Os11g0242800 [Oryza sativa Japonica Group]（NP_001067593.1）	0	0	24.2	noTest	noTest	noTest	noTest	Inf	6.0736e-07	3.8226e-05	up	Inf	3.8664e-06	0.0027865	up
comp594689_c0	Os01g0501800 [Oryza sativa Japonica Group]（NP_001043134.1）	0	0	17.95	noTest	noTest	noTest	noTest	Inf	1.8953e-06	0.00010313	up	Inf	8.226e-06	0.0054224	up
comp58084_c1	Os01g0910900 [Oryza sativa Japonica Group]（NP_001045156.1）	0	0	17.49	noTest	noTest	noTest	noTest	Inf	3.2148e-06	0.00016457	up	Inf	1.3063e-05	0.0081827	up
comp50494_c0	expressed protein [Oryza sativa Japonica Group]（ABA98708.1）	0	0	17.24	noTest	noTest	noTest	noTest	Inf	3.3994e-06	0.00017223	up	Inf	1.3949e-05	0.008555	up
comp534978_c0	Os03g0583800 [Oryza sativa Japonica Group]（NP_001050563.1）	0	0	16.95	noTest	noTest	noTest	noTest	Inf	4.4987e-06	0.00021987	up	Inf	1.7893e-05	0.010428	up
comp419734_c0	Os02g0698000 [Oryza sativa Japonica Group]（NP_001047825.1）	0	0	16.18	noTest	noTest	noTest	noTest	Inf	6.6773e-06	0.00031281	up	Inf	2.6222e-05	0.014646	up
comp50219_c0	Os04g0414700 [Oryza sativa Japonica Group]（NP_001052755.1）	0	0	15.88	noTest	noTest	noTest	noTest	Inf	8.8586e-06	0.00040013	up	Inf	3.3679e-05	0.018352	up
comp1564_c0	Os07g0577600 [Oryza sativa Japonica Group]（NP_001060090.1）	0	0	15.76	noTest	noTest	noTest	noTest	Inf	9.1167e-06	0.00041044	up	Inf	3.4823e-05	0.018822	up
comp76463_c0	conserved hypothetical protein [Ricinus communis]（XP_002533273.1）	15.06	2.01	86.38	noTest	noTest	noTest	noTest	2.731	1.2282e-08	1.1517e-06	up	5.4272	2.9707e-17	9.4812e-14	up
comp71390_c0	class I chitinase [Musa AB Group](ACJ06634.3)	47.31	56.29	0	noTest	noTest	noTest	noTest	-Inf	1.4329e-11	2.1668e-09	down	-Inf	9.16e-16	2.36e-12	down
comp80427_c0	no hit	224.28	54.91	0	-1.9277	6.7315e-09	4.5674e-07	down	-Inf	8.4317e-34	1.4941e-30	down	-Inf	1.4e-15	3.47e-12	down
comp66000_c0	ripening-associated protein [Musa acuminata AAA Group](AAB82774.1)	33.79	36.54	0	noTest	noTest	noTest	noTest	-Inf	0.00018845	0.0053972	down	-Inf	4.24e-11	6.32e-08	down
comp58779_c0	no hit	42.69	21.19	0	noTest	noTest	noTest	noTest	-Inf	5.7272e-08	4.5181e-06	down	-Inf	4.54e-07	0.0004351	down
comp53921_c0	TPA: isoflavone reductase-like protein 5 [Vitis vinifera](CAI56334.1)	16.81	19.49	0	noTest	noTest	noTest	noTest	-Inf	5.6455e-05	0.0019401	down	-Inf	2.07e-06	0.00163	down
comp79295_c0	no hit	129.65	17.9	0	-2.7537	4.8395e-11	4.5673e-09	down	-Inf	1.5838e-24	1.2581e-21	down	-Inf	4.7e-06	0.0032804	down
comp79039_c0	class III acidic chitinase [Musa acuminata](AAS12600.1)	192.7	233.67	0.48	noTest	noTest	noTest	noTest	-8.6458	5.8273e-15	1.5312e-12	down	-9.1416	4.47e-42	3.33e-38	down
comp65991_c0	Chain A, Resolution Of The Structure Of The Allergenic And Antifungal Banana Fruit Thaumatin-Like Protein At 1.7a(1Z3Q)	60.61	62.95	0.53	noTest	noTest	noTest	noTest	-6.6217	8.8169e-13	1.6468e-10	down	-6.8791	2.77e-14	5.99e-11	down
comp77416_c3	no hit	1213.68	326.22	3.16	-1.8294	0.00023608	0.0051992	down	-8.5874	1.859e-21	1.0987e-18	down	-6.801	5.91e-44	5.66e-40	down
comp87229_c0	no hit	2078.02	587.63	5.83	-1.7554	5.3007e-12	5.9107e-10	down	-8.4776	3.75e-67	1.2957e-62	down	-6.7643	1.51e-56	2.03e-52	down
comp83805_c0	no hit	1348.02	391.31	4.33	-1.7175	4.672e-11	4.4336e-09	down	-8.2823	1.1111e-59	1.9196e-55	down	-6.6129	1.82e-46	2.04e-42	down
comp86004_c0	PREDICTED: protein LHY-like [Vitis vinifera](XP_002267720.1)	27084.1	10144	138.6	-1.3505	2.7913e-05	0.00083316	down	-7.6104	4.7128e-40	1.3027e-36	down	-6.3023	7.14e-88	4.79e-83	down
comp75400_c0	Chain A, Banana Lectin(2BMY)	27.48	35.13	0.53	noTest	noTest	noTest	noTest	-5.4806	1.5621e-06	8.6776e-05	down	-6.0375	1.18e-09	1.52e-06	down
comp77416_c1	no hit	1564.03	334.15	5.62	-2.1604	7.0573e-08	3.9379e-06	down	-8.1212	8.0178e-34	1.4581e-30	down	-6	3.5e-41	2.34e-37	down
comp77416_c2	PREDICTED: protein LHY-like [Vitis vinifera](XP_002267720.1)	8949.97	2123.19	37.6	-2.0093	1.7043e-08	1.0777e-06	down	-7.8952	7.7937e-43	2.8347e-39	down	-5.9293	3.99e-70	1.34e-65	down
comp74454_c0	PREDICTED: uncharacterized protein LOC100257088 [Vitis vinifera](XP_002264923.1)	3935.71	2002.1	38.46	-0.87254	0.00036047	0.0074531	down	-6.5334	5.146e-58	7.1124e-54	down	-5.7022	7.88e-68	1.76e-63	down
comp79448_c0	hypothetical protein OsJ_01911 [Oryza sativa Japonica Group](EEE54640.1)	13883	9502.64	336.35	noTest	noTest	noTest	noTest	-5.1563	5.9524e-33	8.9424e-30	down	-4.8203	5.07e-61	8.49e-57	down
comp73917_c0	no hit	42.17	19.1	0.95	noTest	noTest	noTest	noTest	-5.2652	9.8116e-06	0.00043661	down	-4.3319	6.27e-05	0.031571	down
comp79174_c0	PREDICTED: uncharacterized protein LOC100830815 [Brachypodium distachyon](XP_003567358.1)	2604.91	760.59	39.33	-1.6738	2.6772e-11	2.6694e-09	down	-5.9044	2.3622e-49	1.6324e-45	down	-4.2733	3.67e-39	2.23e-35	down
comp85413_c0	unnamed protein product [Vitis vinifera](CBI23090.3)	1087.82	957.95	58.4	noTest	noTest	noTest	noTest	-4.0077	1.5407e-07	1.1056e-05	down	-4.0358	5.14e-33	2.87e-29	down
